# Supplementary material for: Malvidin-3-O-arabinoside ameliorates ethyl carbamate-induced oxidative damage by stimulating AMPK-mediated autophagy
Source: Royal Society of Chemistry journal article supplement (doi:10.1039/d0fo01562h), 2020-01-01
Supplement: d0fo01562h1.pdf [file d0fo01562h1.pdf]

## **Supplementary Information**

**Malvidin-3-*O*-arabinoside ameliorates ethyl carbamate-induced oxidative damage  
by stimulating AMPK-mediated autophagy**

**Table S1**

Concentrations of anthocyanins (mg/100 g FW) in blueberry determined by HPLC.

| Peak 1    | Peak 2   | Peak 3   | Peak 4    | Peak 5   | Peak 6    | Peak 7   | Peak 8   | Peak 9   | Peak 10   | Peak 11   | Peak 12   |
|-----------|----------|----------|-----------|----------|-----------|----------|----------|----------|-----------|-----------|-----------|
| D3Ga      | D3G      | C3Ga     | D3A       | C3G      | Pet3Ga    | C3A      | Pet3G    | Pet3A    | M3Ga      | M3G       | M3A       |
| 27.63±0.1 | 7.94±0.2 | 4.55±0.3 | 15.03±0.2 | 1.32±0.2 | 26.29±0.1 | 2.39±0.2 | 7.44±0.3 | 9.37±0.6 | 28.81±0.4 | 12.78±0.2 | 20.35±0.4 |

D3Ga, delphinidin-3-*O*-galactoside; D3G, delphinidin-3-*O*-glucoside; C3Ga, cyanidin-3-*O*-galactoside; D3A, delphinidin-3-*O*-arabinoside; C3G, cyanidin-3-*O*-glucoside; Pet3Ga, petunidin-3-*O*-galactoside; C3A, cyanidin-3-*O*-arabinoside; Pet3G, petunidin-3-*O*-glucoside; Pet3A, petunidin-3-*O*-arabinoside; M3Ga, malvidin-3-*O*-galactoside; M3G, malvidin-3-*O*-glucoside; M3A, malvidin-3-*O*-arabinoside

Fig. S1

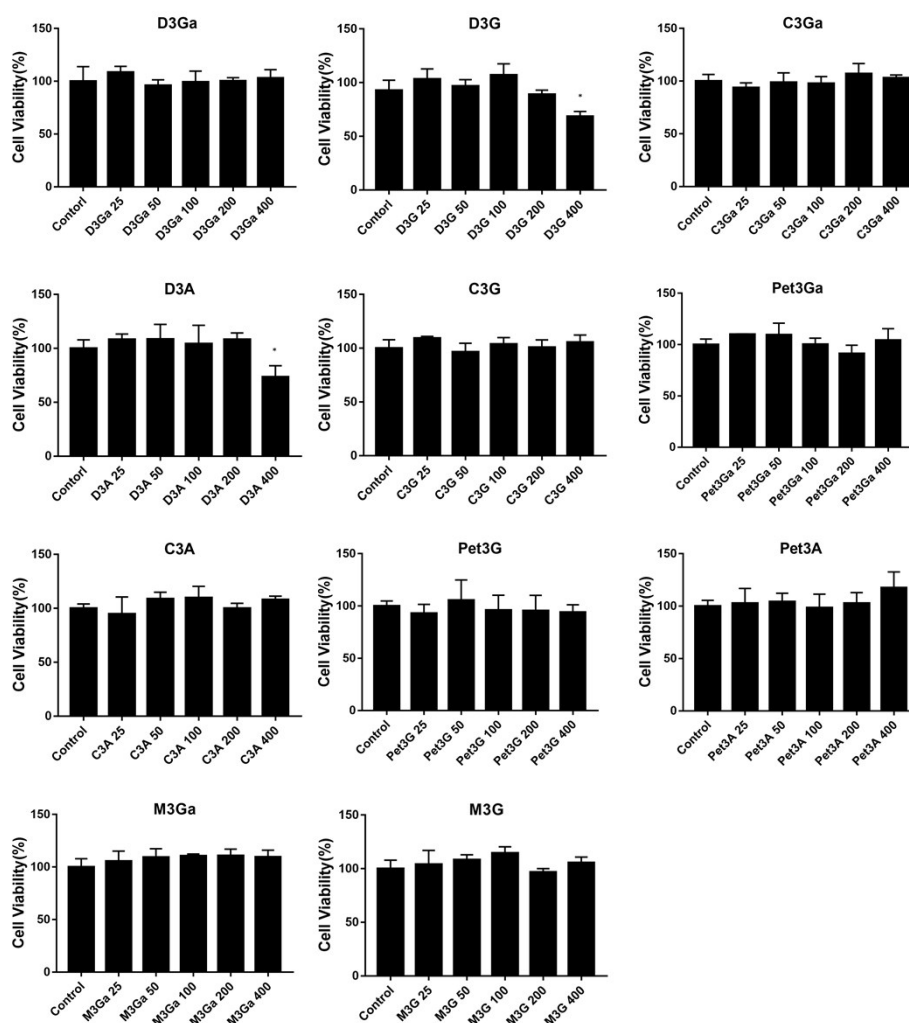

Caco-2 cells were first treated with different concentrations (25, 50, 100, 200 and 400 μM) of anthocyanins for 24 h. Cell viability was detected by MTT assay. \* $p < 0.05$ .

D3Ga, delphinidin-3-*O*-galactoside; D3G, delphinidin-3-*O*-glucoside; C3Ga, cyanidin-3-*O*-galactoside; D3A, delphinidin-3-*O*-arabinoside; C3G, cyanidin-3-*O*-glucoside; Pet3Ga, petunidin-3- galactoside; C3A, cyanidin-3-*O*-arabinoside; Pet3G, petunidin-3-glucoside; Pet3A petunidin-3-*O*-arabinoside; M3Ga, malvidin-3-*O*-galactoside; M3G, malvidin-3-*O*- glucoside.

**Fig. S2**

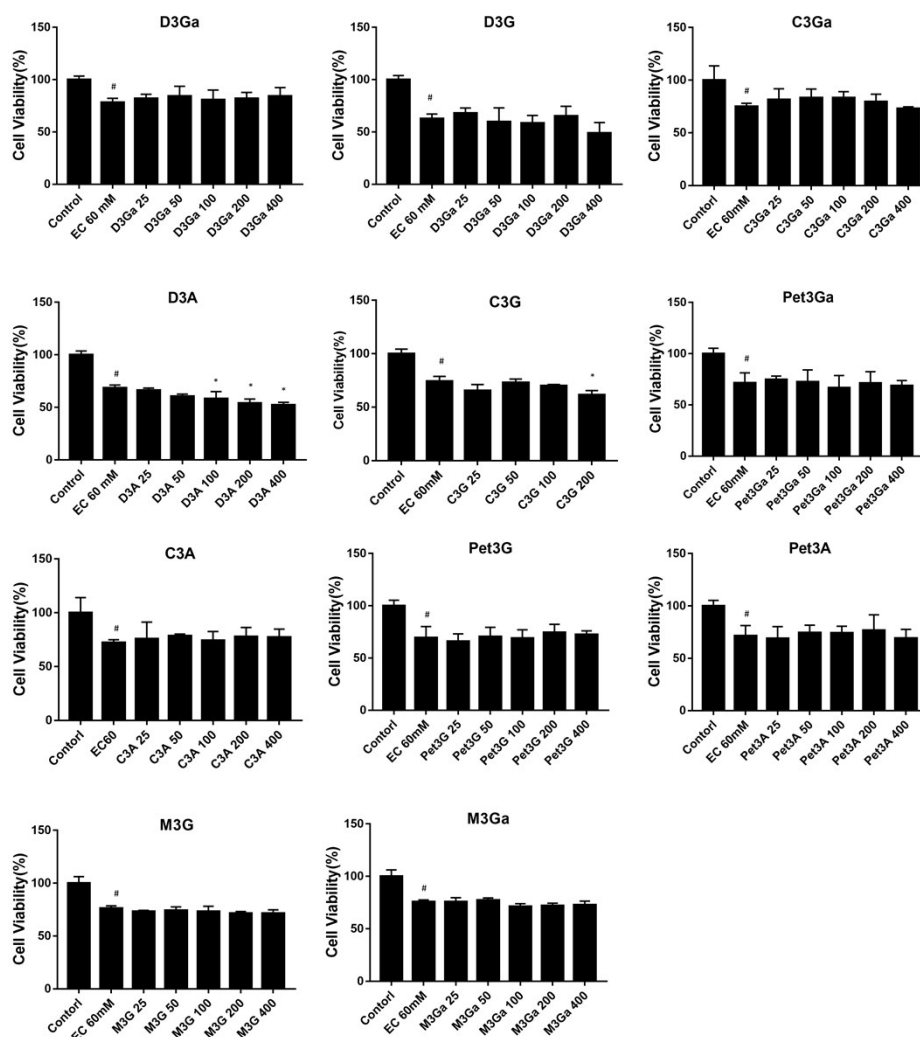

Caco-2 cells were first treated with different concentrations (25, 50, 100, 200 and 400 μM) of M3A for 24 h and then incubated with 60 mM EC for 24 h. Cell viability was detected by MTT assay. # $p < 0.05$  versus control group, \* $p < 0.05$  versus EC group. D3Ga, delphinidin-3-*O*-galactoside; D3G, delphinidin-3-*O*-glucoside; C3Ga, cyanidin-3-*O*-galactoside; D3A, delphinidin-3-*O*-arabinoside; C3G, cyanidin-3-*O*-glucoside; Pet3Ga, petunidin-3- galactoside; C3A, cyanidin-3-*O*-arabinoside; Pet3G, petunidin-3-glucoside; Pet3A petunidin-3-*O*-arabinoside; M3Ga, malvidin-3-*O*-galactoside; M3G, malvidin-3-*O*-glucoside; EC, Ethyl carbamate.

Fig. S3

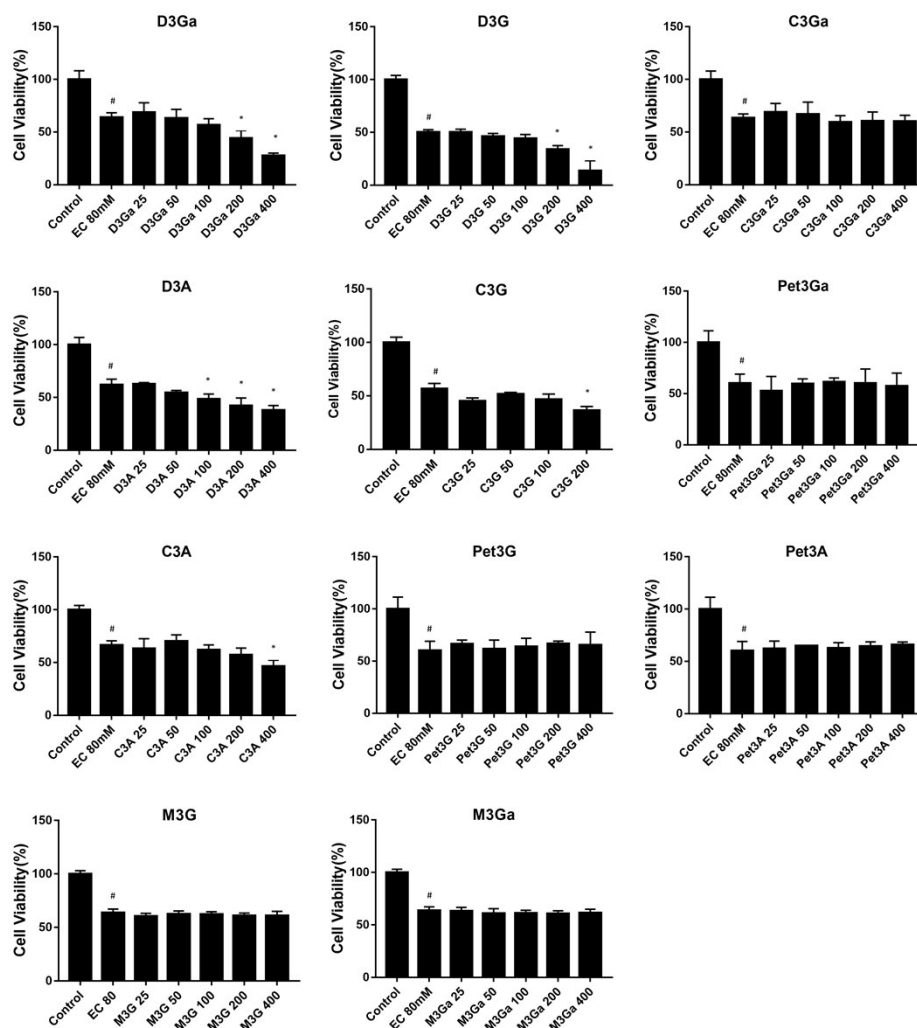

Caco-2 cells were first treated with different concentrations (25, 50, 100, 200 and 400  $\mu\text{M}$ ) of M3A for 24 h and then incubated with 80 mM EC for 24 h. Cell viability was detected by MTT assay. # $p < 0.05$  versus control group, \* $p < 0.05$  versus EC group. D3Ga, delphinidin-3-*O*-galactoside; D3G, delphinidin-3-*O*-glucoside; C3Ga, cyanidin-3-*O*-galactoside; D3A, delphinidin-3-*O*-arabinoside; C3G, cyanidin-3-*O*-glucoside; Pet3Ga, petunidin-3- galactoside; C3A, cyanidin-3-*O*-arabinoside; Pet3G, petunidin-3-*O*-glucoside; Pet3A petunidin-3-*O*-arabinoside; M3Ga, malvidin-3-*O*-galactoside; M3G, malvidin-3-*O*- glucoside; EC, Ethyl carbamate.
